CORRECTION

# Correction: The potential role of kelp forests on iodine speciation in coastal seawater

Jennifer Gonzales, Teresa Tymon, Frithjof C. Küpper, Matthew S. Edwards, Carl J. Carrano

The following information is missing from the Funding section: Additional funding was provided to FCK by the UK Natural Environment Research Council within the framework of the Oceans 2025 program / WP 4.5.

The images for Figs 2 and 3 are incorrectly switched. The image that appears as Fig 2 should be Fig 3, and the image that appears as Fig 3 should be Fig 2. The figure captions appear in the correct order.

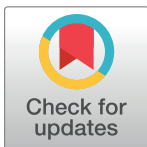

 OPEN ACCESS

**Citation:** Gonzales J, Tymon T, Küpper FC, Edwards MS, Carrano CJ (2017) Correction: The potential role of kelp forests on iodine speciation in coastal seawater. PLoS ONE 12(12): e0189559. <https://doi.org/10.1371/journal.pone.0189559>

**Published:** December 7, 2017

**Copyright:** © 2017 Gonzales et al. This is an open access article distributed under the terms of the [Creative Commons Attribution License](https://creativecommons.org/licenses/by/4.0/), which permits unrestricted use, distribution, and reproduction in any medium, provided the original author and source are credited.

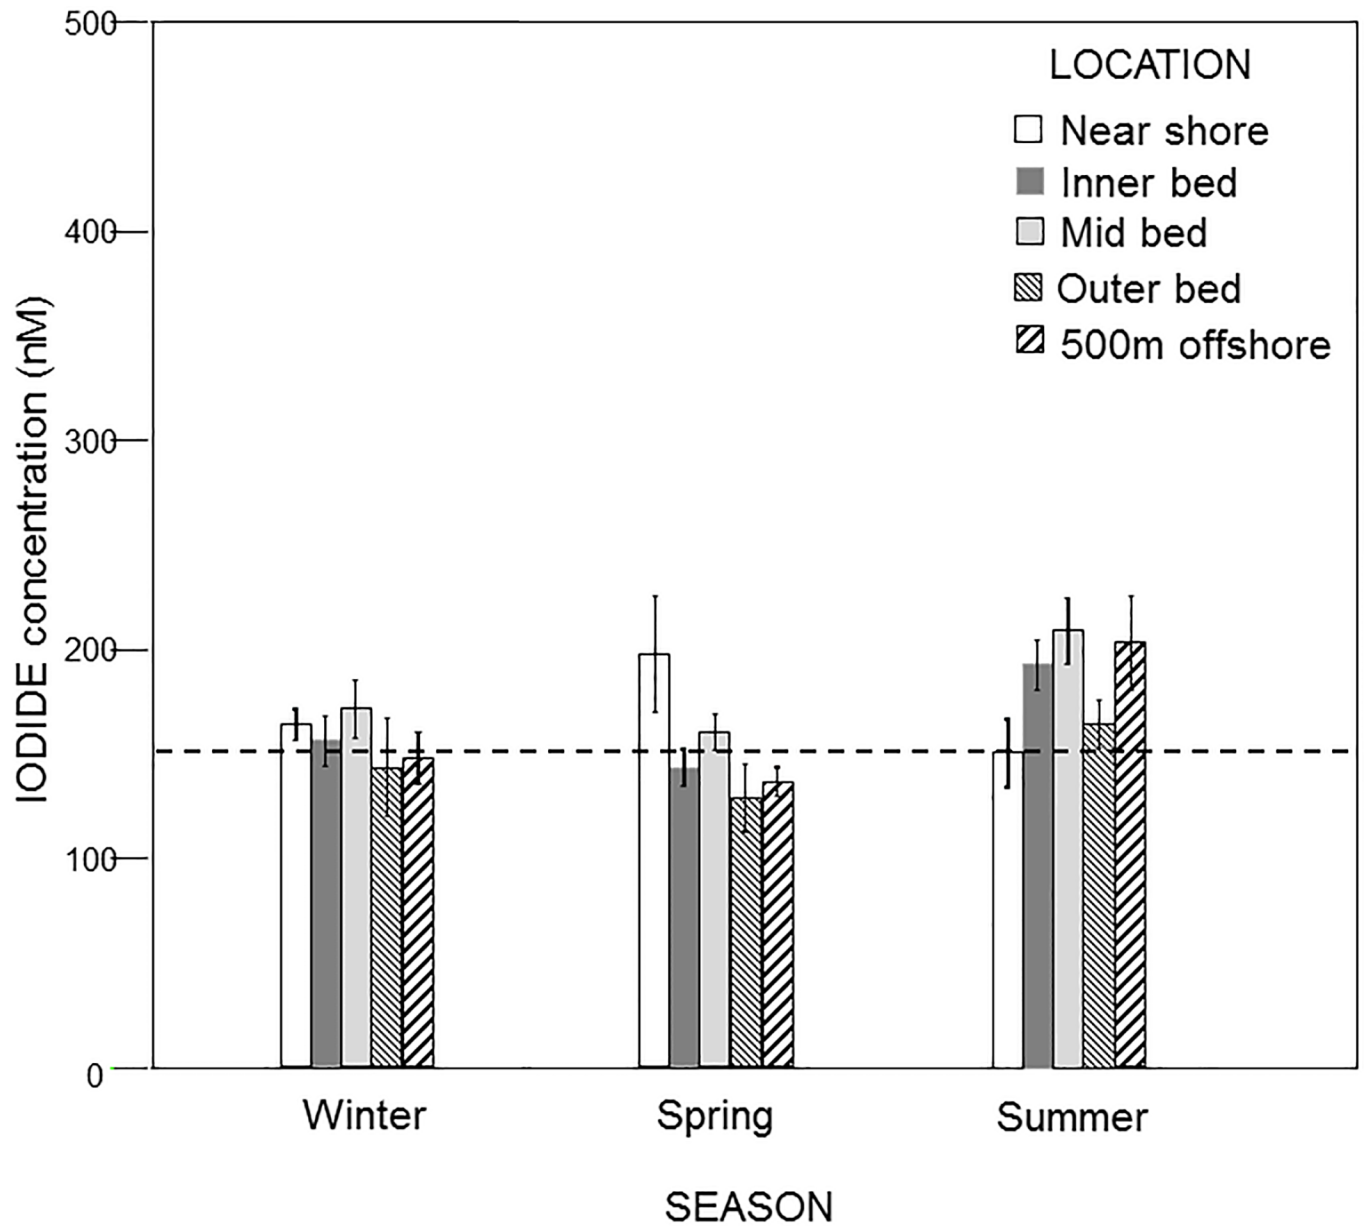

**Fig 2. Pooled iodide concentrations (mean  $\pm$  standard deviation) as a function of season at five locations within the Pt. Loma kelp forest.** The dotted line represents the mean iodide concentration at the Scripps Pier control site.

<https://doi.org/10.1371/journal.pone.0189559.g001>

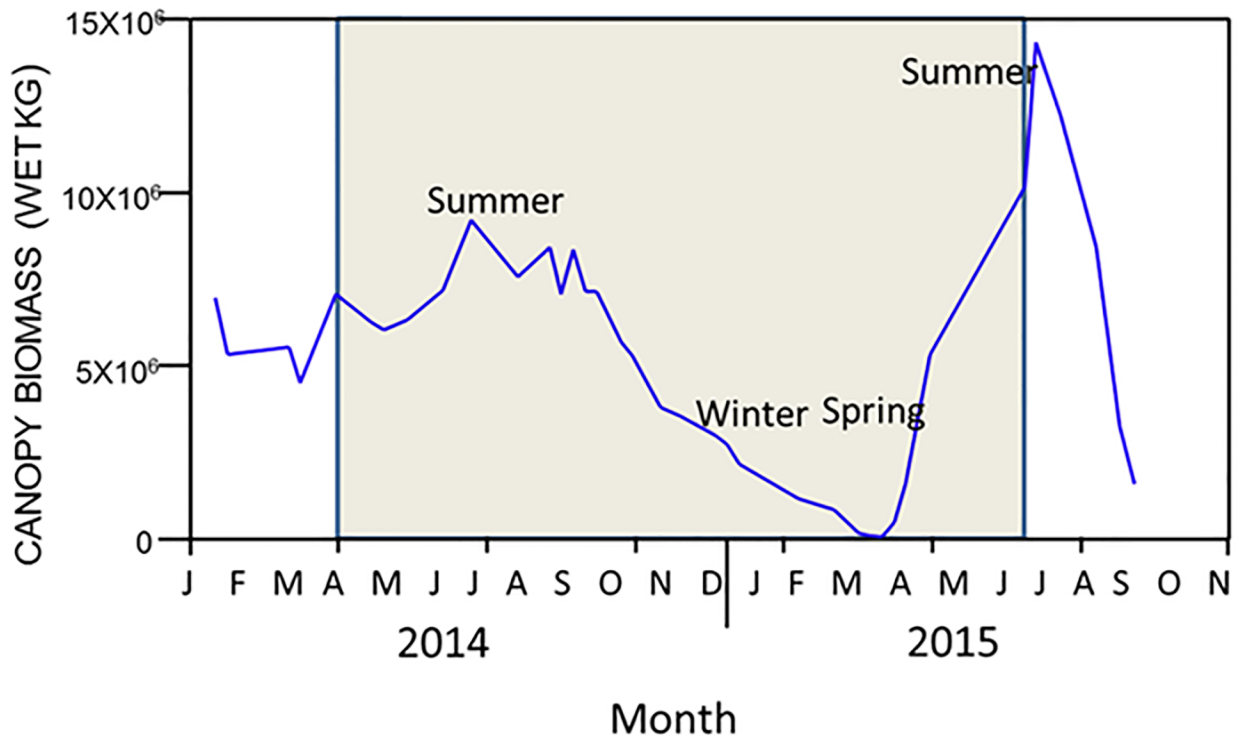

**Fig 3. Kelp forest canopy biomass from 2014–2015 as estimated from Landsat imagery, and expressed as biomass in wet kg.** The grey box represents the time frame of this study.

<https://doi.org/10.1371/journal.pone.0189559.g002>

### Reference

- Gonzales J, Tymon T, Küpper FC, Edwards MS, Carrano CJ (2017) The potential role of kelp forests on iodine speciation in coastal seawater. PLoS ONE 12(8): e0180755. <https://doi.org/10.1371/journal.pone.0180755> PMID: 28800586
